# Supplementary material for: Difference in the songs of paired and unpaired southern yellow-cheeked gibbon males (Nomascus gabriellae): social status or age?
Source: Frontiers journal article supplement (doi:10.3389/fevo.2023.956922), 2023-07-28
Supplement: Table_2.DOCX [file Table_2.DOCX]

**Table S2:** Overview of subject males

| **Zoo and Country** | **Group** | **Subjects of the study** | **Subject no., place and date of birth as recorded in the European studbook (Birot *et al*. 2022)** | **Social organization** | **Age of males during the study** |
| --- | --- | --- | --- | --- | --- |
| Jihlava  (Czech Republic) | 1 | Male 1 | No. 36, in the wild, ~ 1988 | Paired | ~27 ~29, ~31 - ~33 years |
|  | Male 2 | No. 173, Jihlava, 2 April 2011 | Unpaired | 9.3, 10.3 years |
|  | 2 | Male 3 | No. 142, Jihlava, 29 November 2007 | Unpaired | 8.10, 8,11, 9.8, 10.10 years |
|  | Male 4 | No. 158, Jihlava, 14 October 2009 | Unpaired | 7.9, 8.11 years |
| Olomouc  (Czech Republic) | 3 | Male 5 | No. 100, Jihlava, 22 February 2002 | Paired | 13, 14.5, 14.7, 18.7 years |
|  | 4 | Male 6 | No. 113, Jihlava, 14 November 2003 | Paired | 11.4 - 11.7, 12.8, 12.10, 13.10, 17.10 years |
| Chleby  (Czech Republic) | 5 | Male 7 | No. 34, in the wild, ~ 1987 | Paired | ~34 years |
|  | Male 8 | No. 172, Chleby, 22 April 2009 | Unpaired | 9 years |
| Bojnice  (Slovak Republic) | 6 | Male 9 | No. 37, in the wild, ~ 1988 | Paired | ~29 and ~32 years |
|  | Male 10 | No. 148, Bojnice, 2 April 2008 | Unpaired | 8.11 years |
|  | Male 11 | No. 184, Bojnice, 25 January 2013 | Unpaired | 7.7 years |
| Košice  (Slovak Republic) | 7 | Male 12 | No. 178, Olomouc, 15 April 2011 | Unpaired | 8.3 years |
| Bratislava  (Slovak Republic) | 8 | Male 13 | No. 95, Bratislava, 24 May 2001 | Paired | 17.5 years |
| Ljubljana  (Republic of Slovenia) | 9 | Male 14 | No. 31, in the wild, ~ 1987 | Paired | ~31 years |
