# Supplementary material for: Difference in the songs of paired and unpaired southern yellow-cheeked gibbon males (Nomascus gabriellae): social status or age?
Source: Frontiers journal article supplement (doi:10.3389/fevo.2023.956922), 2023-07-28
Supplement: Table_3.docx [file Table_3.docx]

**Table S3:** Information on the dimensions of the indoor and outdoor enclosures.

The indoor enclosures (Bojnice: area - 18.7 m2, height - 4 m; Jihlava group 1: area - 21 m2, height - 7 m; Jihlava group 2: area - 20 m2, height - 7 m; Bratislava: area - 18.2 m2, height - 2.8 m; Olomouc group 1: area - 16 m2, height - 4 m; Olomouc group 2: area - 14 m2, height - 4 m; Chleby: area - 20.2 m2, height - 4 m; Košice: area - 50.2 m2, height - 2.3 m; Ljubljana: area - 26 m2, height - 3.25 m).

The outdoor enclosures (Bojnice: area - 63 m2, height - 6 m; Jihlava group 1: area - 104 m2, height - 13 m; Jihlava group 2: area - 100 m2, height - 13 m; Bratislava: area - 54 m2, height - 2.9 m; Olomouc group 1: area - 35 m2, height - 4.5 m; Olomouc group 2: area - 38 m2, height - 4 m; Chleby: area - 35.5 m2, height - 8 m; Košice: area - 100 m2, height - 3.3 m). The island (Ljubljana: area - 98 m2) featured platforms at various heights, trees and extensive rope systems. The outdoor enclosures were covered with wire-mesh or glass.
