# Supplementary material for: Difference in the songs of paired and unpaired southern yellow-cheeked gibbon males (Nomascus gabriellae): social status or age?
Source: Frontiers journal article supplement (doi:10.3389/fevo.2023.956922), 2023-07-28
Supplement: Table_4.docx [file Table_4.docx]

**Table S4:** Overall composition of family groups

| **Zoo and Country** | **Group** | **Subjects of the study** | **Subject no., place and date of birth as recorded in the European studbook (Birot et al. 2022)** | **Information about family groups (sex. No.) given in the European studbook (Birot et al. 2022)** |
| --- | --- | --- | --- | --- |
| Jihlava  (Czech Republic) | 1 | Male 1 | No. 36, in the wild, ~ 1988 | **Adults**  Male, No. 36  Female, No. 84  **Offspring**  Unpaired male, No. 173  Unpaired male, No. 213  Unpaired female, No. 226 |
| Male 2 | No. 173, Jihlava, 2 April 2011 |
| 2 | Male 3 | No. 142, Jihlava, 29 November 2007 | **Adult**  Female, No. 20  **Offspring (Adult male)**  Unpaired male, No. 142*  Unpaired male, No. 158* |
| Male 4 | No. 158, Jihlava, 14 October 2009 |
| Olomouc  (Czech Republic) | 3 | Male 5 | No. 100, Jihlava, 22 February 2002 | **Adults**  Male, No. 100  Female, No. 110  **Offspring**  Unpaired female, No. 204 |
|  | 4 | Male 6 | No. 113, Jihlava, 14 November 2003 | **Adults**  Male, No. 113  Female, No. 54 |
| Chleby  (Czech Republic) | 5 | Male 7 | No. 34, in the wild, ~ 1987 | **Adults**  Male, No. 34  Female, No. 35  **Offspring**  Unpaired male, No. 172 |
| Male 8 | No. 172, Chleby, 22 April 2009 |
| Bojnice  (Slovak Republic) | 6 | Male 9 | No. 37, in the wild, ~ 1988 | **Adults**  Male, No. 37  Female, No. 80  **Offspring**  Unpaired male, No.148  Unpaired male, No.184  Unpaired female, No.199 |
| Male 10 | No. 148, Bojnice, 2 April 2008 |
| Male 11 | No. 184, Bojnice, 25 January 2013 |
| Košice  (Slovak Republic) | 7 | Male 12 | No. 178, Olomouc, 15 April 2011 | **Adults male**  Unpaired male, No.178*  Unpaired male, No.194* |
| Bratislava  (Slovak Republic) | 8 | Male 13 | No. 95, Bratislava, 24 May 2001 | **Adults**  Paired male, No. 95  Paired female, No. 133  **Offspring**  Unpaired female, No. 200  Unpaired male, No. 220 |
| Ljubljana  (Republic of Slovenia) | 9 | Male 14 | No. 31, in the wild, ~ 1987 | **Adults**  Paired male, No. 31  Paired female, No. 32  **Offspring**  Unpaired male, No. 174 |

* Brothers
